# Supplementary material for: Chimeric antigen receptor T-cell therapy for autoimmune diseases of the central nervous system: a systematic literature review
Source: PubMed Central journal article supplement (PMC11446985; doi:10.1007/s00415-024-12642-4), 2024-09-14

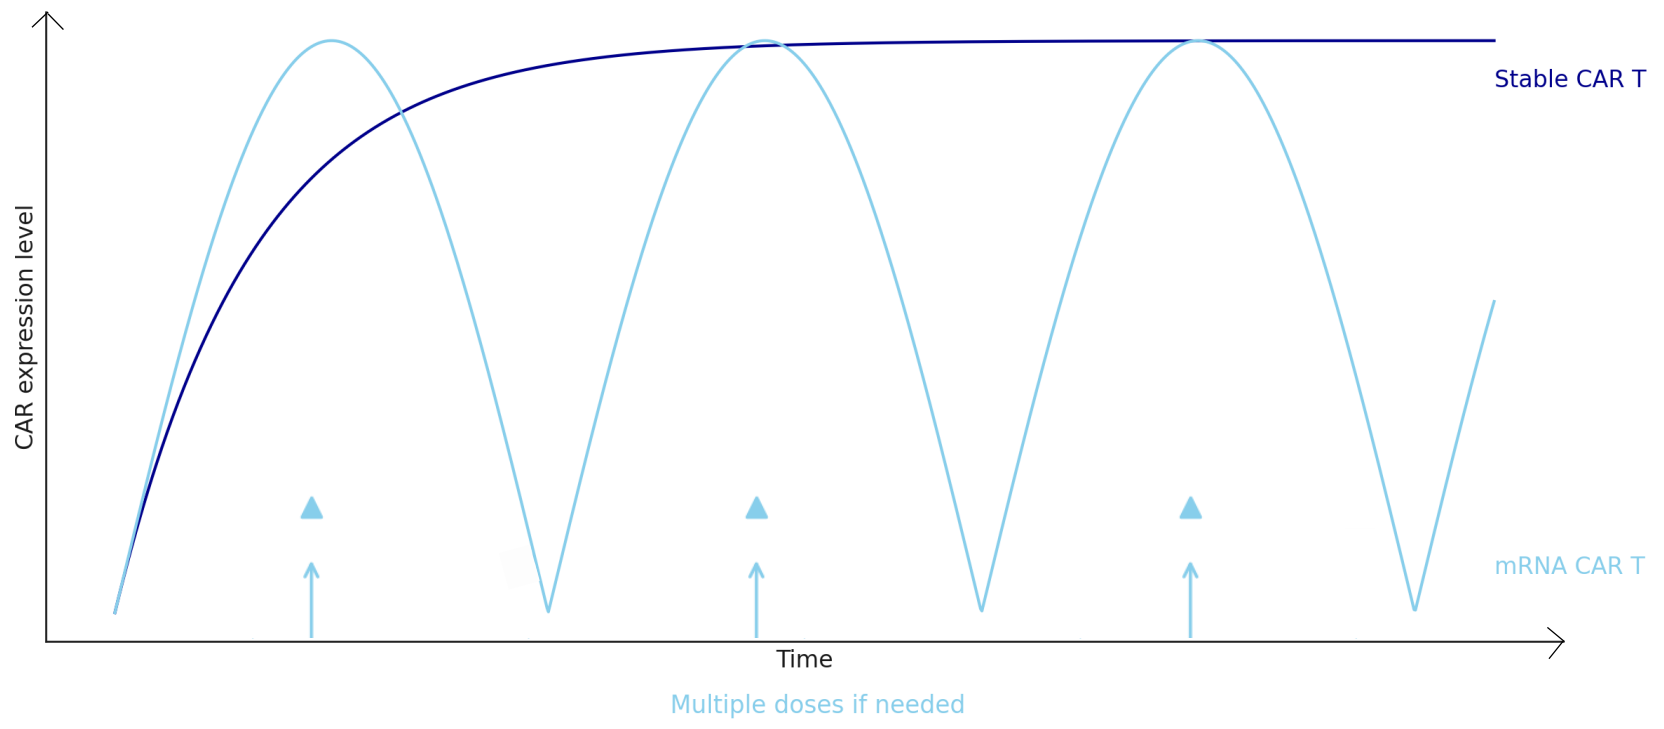

Supplement: 415_2024_12642_MOESM2_ESM.pdf [file 415_2024_12642_MOESM2_ESM.pdf]
